# Supplementary material
Source: PubMed Central journal article supplement (PMC8062283)
Supplement: NIHMS1684640-supplement-Supplemental_material.pdf [file NIHMS1684640-supplement-Supplemental_material.pdf]

## SUPPLEMENTAL MATERIALS

### **PLASMA PROTEIN PROFILE OF CAROTID ARTERY ATHEROSCLEROSIS AND ATHEROSCLEROTIC OUTCOMES - META-ANALYSES AND MENDELIAN RANDOMIZATION ANALYSES**

Lars Lind,\* Bruna Gigante, Yan Borné, Tobias Feldreich, Jerzy Leppert, Pär Hedberg, Carl Johan Östgren, Fredrik H. Nyström, Johan Sundström, Johan Ärnlöv, Damiano Baldassarre, Elena Tremoli, Fabrizio Veglia, Anders Hamsten, Christopher J. O'Donnell, Nora Franceschini, Marju Orho-Melander, Jan Nilsson, Olle Melander, Gunnar Engström, Anders Mälarstig

From the Department of Medical Sciences, Uppsala University, Sweden (L.L., J.S.); Unit of Cardiovascular Medicine, Department of Medicine, Karolinska Institutet, Sweden (B.G., A.H., A.M.); Department of Clinical Sciences Malmö, Lund University, Sweden (Y.B., M.O-M., J.N., O.M., G.E.); School of Health and Social Sciences, Dalarna University, Falun, Sweden (T.F., J.Ä.); Centre for Clinical Research, Uppsala University, Västmanland County Hospital, Västerås, Sweden (J.L., P.H.); Department of Clinical Physiology, Västmanland County Hospital, Västerås Sweden (P.H.); Department of Health, Medicine and Caring Sciences, Linköping University, Linköping, Sweden (C.J.Ö., F.H.N.); The George Institute for Global Health, University of New South Wales, Sydney, Australia (J.S.); Division of Family Medicine and Primary Care, Department of Neurobiology, Care Sciences and Society, Karolinska Institutet, Huddinge, Sweden (J.Ä.); Damiano Baldassarre, Department of Medical Biotechnology and Translational Medicine, Università di Milano, (D.B.) and Centro Cardiologico Monzino, IRCCS, Milan, Italy (D.B., E.T., F.V.); Department of Medicine, Boston University, Boston, USA (C.J.O'D.); and Department of Epidemiology, University of North Carolina, Chapel Hill, USA (N.F.).

**Supplemental Table I. SNPs chosen from the SCALLOP study to be used as instrumental variables.**

The SNPs are not in LD. \* following the rs-number indicates a cis-SNP.

| ADM    | snpid             | rsid         | effect_allele_exposure | other_allele_exposure | eaf_exposure |
|--------|-------------------|--------------|------------------------|-----------------------|--------------|
|        | 11:10363157:A_G   | rs148339496* | A                      | G                     | .7287        |
|        | 6:31239227:C_T    | rs9264664    | T                      | C                     | .6684        |
|        | 4:187145222:C_G   | rs4862669    | C                      | G                     | .517         |
|        | 2:163120823:C_T   | rs12465701   | T                      | C                     | .0208        |
|        |                   |              |                        |                       |              |
| AGRP   | snpid             | rsid         | effect_allele_exposure | other_allele_exposure | eaf_exposure |
|        | 2:177544551:C_G   | rs4894192    | C                      | G                     | .6667        |
|        | 12:115554085:A_AT | rs11451130   | A                      | AT                    | .6108        |
|        |                   |              |                        |                       |              |
| CA-125 | snpid             | rsid         | effect_allele_exposure | other_allele_exposure | eaf_exposure |
|        | 19:9136306:C_G    | rs11672713*  | C                      | G                     | .7221        |
|        | 2:242728098:C_T   | rs62193063   | T                      | C                     | .1745        |
|        | 16:828080:C_T     | rs114590746  | T                      | C                     | .0116        |
|        | 2:242758326:A_G   | rs2293761    | A                      | G                     | .3809        |
|        |                   |              |                        |                       |              |
| MMP-12 | snpid             | rsid         | effect_allele_exposure | other_allele_exposure | eaf_exposure |
|        | 19:54759361:C_T   | rs12975366   | T                      | C                     | .6016        |
|        | 11:102721251:C_T  | rs72981675*  | T                      | C                     | .1374        |
|        | 11:104661163:C_T  | rs1201821    | T                      | C                     | .8572        |
|        | 13:72450627:C_T   | rs117953762  | T                      | C                     | .9808        |
|        |                   |              |                        |                       |              |
| GAL    | snpid             | rsid         | effect_allele_exposure | other_allele_exposure | eaf_exposure |
|        | 17:67081278:A_G   | rs77542162   | A                      | G                     | .9815        |

|                  |                 |              |                        |                       |              |
|------------------|-----------------|--------------|------------------------|-----------------------|--------------|
|                  | 6:1690341:A_G   | rs9405503    | A                      | G                     | .9023        |
|                  | 3:12127827:A_G  | rs307575     | A                      | G                     | .2376        |
|                  | 2:60493485:A_G  | rs4672375    | A                      | G                     | .4165        |
|                  |                 |              |                        |                       |              |
| <b>NT-proBNP</b> | snpid           | rsid         | effect_allele_exposure | other_allele_exposure | eaf_exposure |
|                  | 1:11919271:A_G  | rs198389*    | A                      | G                     | .5961        |
|                  |                 |              |                        |                       |              |
| <b>CD40</b>      | snpid           | rsid         | effect_allele_exposure | other_allele_exposure | eaf_exposure |
|                  | 19:57835252:C_T | rs4801216    | T                      | C                     | .6029        |
|                  | 20:44747947:G_T | rs4810485**  | T                      | G                     | .2631        |
|                  | 20:44243169:C_T | rs45497891*  | T                      | C                     | .023         |
|                  |                 |              |                        |                       |              |
| <b>MCP-1</b>     | snpid           | rsid         | effect_allele_exposure | other_allele_exposure | eaf_exposure |
|                  | 1:159175354:A_G | rs12075      | A                      | G                     | .5596        |
|                  | 3:128321226:A_G | rs9811380    | A                      | G                     | .7063        |
|                  | 3:46370803:C_T  | rs2888526    | T                      | C                     | .094         |
|                  | 17:32533423:A_T | rs12601658*  | A                      | T                     | .2341        |
|                  | 1:189005771:C_T | rs189403619  | T                      | C                     | .989         |
|                  | 3:42906116:C_T  | rs2228467    | T                      | C                     | .9289        |
|                  | 3:46215107:A_G  | rs34198655   | A                      | G                     | .0915        |
|                  |                 |              |                        |                       |              |
| <b>ECP</b>       | snpid           | rsid         | effect_allele_exposure | other_allele_exposure | eaf_exposure |
|                  | 14:21385991:C_T | rs147307766* | T                      | C                     | .0414        |
|                  | 2:33319380:A_T  | rs72793754   | A                      | T                     | .8545        |
|                  |                 |              |                        |                       |              |
| <b>CASP-8</b>    | snpid           | rsid         | effect_allele_exposure | other_allele_exposure | eaf_exposure |
|                  | 2:202150914:A_G | rs35550815*  | A                      | G                     | .8723        |

|               |                  |             |                        |                       |              |
|---------------|------------------|-------------|------------------------|-----------------------|--------------|
|               | 19:54321933:A_G  | rs10424405  | A                      | G                     | .7796        |
|               |                  |             |                        |                       |              |
| <b>PAPPA</b>  | snpid            | rsid        | effect_allele_exposure | other_allele_exposure | eaf_exposure |
|               | 3:128306757:A_G  | rs13089722  | A                      | G                     | .1214        |
|               | 11:54899333:A_C  | rs2262535   | A                      | C                     | .0401        |
|               | 3:47220341:C_T   | rs12497115  | T                      | C                     | .1809        |
|               | 7:2446680:A_T    | rs7808353   | A                      | T                     | .8314        |
|               | 11:47534637:A_G  | rs139689864 | A                      | G                     | .9654        |
|               | 9:119066203:C_T  | rs17372936* | T                      | C                     | .7763        |
|               | 11:57157405:A_G  | rs490358    | A                      | G                     | .2758        |
|               | 12:111932800:C_T | rs7137828   | T                      | C                     | .5314        |
|               | 11:49726596:A_C  | rs151199595 | A                      | C                     | .0382        |
|               | 3:126237413:C_T  | rs1687479   | T                      | C                     | .6638        |
|               | 4:102896591:G_T  | rs13109404  | T                      | G                     | .9367        |
|               |                  |             |                        |                       |              |
| <b>CD40-L</b> | snpid            | rsid        | effect_allele_exposure | other_allele_exposure | eaf_exposure |
|               | 8:106590706:A_G  | rs4602861   | A                      | G                     | .7511        |
|               |                  |             |                        |                       |              |
| <b>HSP-27</b> | snpid            | rsid        | effect_allele_exposure | other_allele_exposure | eaf_exposure |
|               | 7:75861673:C_T   | rs57272821* | T                      | C                     | .6242        |
|               | 7:75930759:C_G   | rs2868371** | C                      | G                     | .7405        |
|               |                  |             |                        |                       |              |
| <b>TM</b>     | snpid            | rsid        | effect_allele_exposure | other_allele_exposure | eaf_exposure |
|               | 1:179526214:C_T  | rs61747728  | T                      | C                     | .0398        |
|               | 20:22684265:C_T  | rs13039845* | T                      | C                     | .7317        |
|               | 19:36329387:A_G  | rs71354106  | A                      | G                     | .0688        |
|               | 20:23028724:A_G  | rs1042579** | A                      | G                     | .1994        |

|               |                  |             |                        |                       |              |
|---------------|------------------|-------------|------------------------|-----------------------|--------------|
|               | 9:136143442:A_G  | rs612169    | A                      | G                     | .6245        |
|               |                  |             |                        |                       |              |
| GDF-15        | snpid            | rsid        | effect_allele_exposure | other_allele_exposure | eaf_exposure |
|               | 19:18501034:C_T  | rs1227734*  | T                      | C                     | .1362        |
|               |                  |             |                        |                       |              |
|               |                  |             |                        |                       |              |
| TIM-1 (KIM-1) | snpid            | rsid        | effect_allele_exposure | other_allele_exposure | eaf_exposure |
|               | 16:20392332:A_G  | rs77924615  | A                      | G                     | .198         |
|               | 17:46683800:C_T  | rs12952262  | T                      | C                     | .1648        |
|               | 15:58726744:C_G  | rs261334    | C                      | G                     | .7821        |
|               | 8:126500031:C_G  | rs28601761  | C                      | G                     | .5823        |
|               | 5:156472149:A_C  | rs6555820*  | A                      | C                     | .469         |
|               | 17:66882466:G_T  | rs4148005   | T                      | G                     | .6873        |
|               | 1:43741713:A_G   | rs2991996   | A                      | G                     | .4294        |
|               | 15:39221710:A_G  | rs2411218   | A                      | G                     | .5815        |
|               |                  |             |                        |                       |              |
| IL-6          | snpid            | rsid        | effect_allele_exposure | other_allele_exposure | eaf_exposure |
|               | 1:154426970:A_C  | rs2228145   | A                      | C                     | .6214        |
|               |                  |             |                        |                       |              |
| U-PAR         | snpid            | rsid        | effect_allele_exposure | other_allele_exposure | eaf_exposure |
|               | 19:44156472:C_T  | rs2302524** | T                      | C                     | .8425        |
|               | 19:44292166:A_G  | rs12463370* | A                      | G                     | .5487        |
|               | 17:7173279:C_G   | rs12449427  | C                      | G                     | .2523        |
|               | 11:126232385:C_T | rs3967200   | T                      | C                     | .1462        |
|               | 10:75682176:A_G  | rs2688619   | A                      | G                     | .4588        |
|               | 4:187161211:C_T  | rs66530140  | T                      | C                     | .4796        |
|               | 2:160708645:C_G  | rs2162500   | C                      | G                     | .4624        |

| TRAIL-R2 | snpid            | rsid         | effect_allele_exposure | other_allele_exposure | eaf_exposure |
|----------|------------------|--------------|------------------------|-----------------------|--------------|
|          | 8:22885331:A_T   | rs2293400**  | A                      | T                     | .6624        |
|          | 8:22955307:C_G   | rs4871846*   | C                      | G                     | .6012        |
|          |                  |              |                        |                       |              |
| LOX-1    | snpid            | rsid         | effect_allele_exposure | other_allele_exposure | eaf_exposure |
|          | 17:38140927:A_C  | rs2305482    | A                      | C                     | .4569        |
|          | 12:10333347:A_G  | rs10505752*  | A                      | G                     | .1639        |
|          | 1:27173449:C_T   | rs6686271    | T                      | C                     | .8383        |
|          | 11:72945341:C_T  | rs2511241    | T                      | C                     | .9191        |
|          | 3:141125186:A_G  | rs1344674    | A                      | G                     | .5582        |
|          |                  |              |                        |                       |              |
| MMP-10   | snpid            | rsid         | effect_allele_exposure | other_allele_exposure | eaf_exposure |
|          | 11:102590777:A_G | rs2012390*   | A                      | G                     | .7679        |
|          | 11:102649482:C_T | rs17860955** | T                      | C                     | .9832        |
|          | 19:49206674:A_G  | rs601338     | A                      | G                     | .4498        |
|          |                  |              |                        |                       |              |
| LEP      | snpid            | rsid         | effect_allele_exposure | other_allele_exposure | eaf_exposure |
|          | 7:127898800:A_G  | rs12537573*  | A                      | G                     | .6117        |
|          | 16:53803574:A_T  | rs1558902    | A                      | T                     | .4183        |

**Supplemental Table II. Relationships between cardiovascular proteins and intima-media thickness of the common carotid artery (IMT-CCA) in the discovery analysis performed in the MDC study.** This table only show the proteins with FDR<5% following adjustment for age and sex. Also data following further adjustment for cardiovascular (CV) risk factors are shown.

| Protein                                                      | Age and sex-adjusted |      |                 | Adjusted for CV risk factors |      |                 |
|--------------------------------------------------------------|----------------------|------|-----------------|------------------------------|------|-----------------|
|                                                              | Beta                 | SE   | <i>p</i> -value | Beta                         | SE   | <i>p</i> -value |
| Hepatocyte growth factor (HGF)                               | .023                 | .003 | 1.00e-17        | .013                         | .003 | 4.04e-06        |
| Matrix metalloproteinase-12 (MMP-12)                         | .021                 | .003 | 6.84e-15        | .013                         | .003 | 1.63e-06        |
| T-cell immunoglobulin and mucin domain 1 (TIM-1)             | .018                 | .003 | 5.40e-11        | .008                         | .003 | .004            |
| Matrix metalloproteinase-7 (MMP-7)                           | .016                 | .003 | 3.00e-10        | .01                          | .003 | .000177         |
| Urokinase plasminogen activator surface receptor (U-PAR)     | .016                 | .003 | 4.40e-10        | .01                          | .003 | .0001467        |
| Placenta growth factor (PIGF)                                | .015                 | .003 | 1.00e-08        | .009                         | .003 | .00043          |
| Interleukin-6 (IL-6)                                         | .015                 | .003 | 1.00e-08        | .008                         | .003 | .003            |
| Growth/differentiation factor 15 (GDF-15)                    | .015                 | .003 | 2.30e-08        | .009                         | .003 | .002            |
| C-X-C motif chemokine 6 (CXCL6)                              | .014                 | .003 | 6.00e-08        | .01                          | .003 | .0001228        |
| Cathepsin D (CTSD)                                           | .014                 | .003 | 9.60e-08        | .003                         | .003 | .292            |
| Fibroblast growth factor 23 (FGF-23)                         | .014                 | .003 | 1.00e-07        | .009                         | .003 | .001            |
| Vascular endothelial growth factor A (VEGF-A)                | .014                 | .003 | 1.00e-07        | .007                         | .003 | .007            |
| Cystatin-B (CSTB)                                            | .014                 | .003 | 1.00e-07        | .006                         | .003 | .02             |
| Tumor necrosis factor ligand superfamily member 14 (TNFSF14) | .014                 | .003 | 1.00e-07        | .008                         | .003 | .003            |
| N-terminal pro-B-type natriuretic peptide (NT-pro-BNP)       | .014                 | .003 | 1.04e-07        | .015                         | .003 | 1.11e-08        |
| Osteoprotegerin (OPG)                                        | .014                 | .003 | 2.00e-07        | .008                         | .003 | .003            |
| Caspase-8 (CASP-8)                                           | .013                 | .003 | 2.25e-07        | .008                         | .003 | .001            |

|                                                             |      |      |          |      |      |         |
|-------------------------------------------------------------|------|------|----------|------|------|---------|
| Heparin-binding EGF-like growth factor (HB-EGF)             | .013 | .003 | 6.00e-07 | .009 | .003 | .000294 |
| Follistatin (FS)                                            | .013 | .003 | 6.61e-07 | .006 | .003 | .025    |
| TNF-related apoptosis-inducing ligand receptor 2 (TRAIL-R2) | .013 | .003 | 1.10e-06 | .007 | .003 | .008    |
| Lectin-like oxidized LDL receptor 1 (LOX-1)                 | .012 | .003 | 1.30e-06 | .007 | .003 | .01     |
| Zscore: 169_ITGB1BP2                                        | .012 | .003 | 1.56e-06 | .008 | .002 | .001    |
| Interleukin-1 receptor antagonist protein (IL-1RA)          | .012 | .003 | 1.60e-06 | .002 | .003 | .581    |
| Platelet-derived growth factor subunit B (PDGF subunit B)   | .012 | .003 | 3.20e-06 | .007 | .003 | .004    |
| Interleukin-16 (IL-16)                                      | .012 | .003 | 3.40e-06 | .005 | .003 | .036    |
| Dickkopf-related protein 1 (DKK-1)                          | .012 | .003 | 3.50e-06 | .008 | .003 | .001    |
| Interleukin-8 (IL-8)                                        | .012 | .003 | 6.50e-06 | .007 | .003 | .005    |
| Tumor necrosis factor receptor superfamily member 6 (FAS)   | .012 | .003 | 7.90e-06 | .006 | .003 | .013    |
| Adrenomedullin (AM)                                         | .012 | .003 | 8.60e-06 | .006 | .003 | .038    |
| Zscore: 172_SIRT2                                           | .011 | .003 | 9.10e-06 | .007 | .002 | .003    |
| Macrophage colony-stimulating factor 1 (CSF-1)              | .011 | .003 | 9.80e-06 | .007 | .003 | .005    |
| Tumor necrosis factor receptor 1 (TNF-R1)                   | .011 | .003 | .00002   | .005 | .003 | .054    |
| Epidermal growth factor (EGF)                               | .011 | .003 | .000039  | .006 | .003 | .013    |
| E-selectin (SELE)                                           | .011 | .003 | .0000435 | .002 | .003 | .374    |
| C-C motif chemokine 20 (CCL20)                              | .01  | .003 | .0000462 | .005 | .003 | .08     |
| Proteinase-activated receptor 1 (PAR-1)                     | .01  | .003 | .0000536 | .007 | .002 | .004    |
| Platelet endothelial cell adhesion molecule (PECAM-1)       | .01  | .003 | .0000947 | .006 | .003 | .027    |
| Heat shock 27 kDa protein (HSP 27)                          | .01  | .003 | .0001171 | .006 | .003 | .011    |
| TNF-related apoptosis-inducing ligand (TRAIL)               | .01  | .003 | .0001769 | .004 | .003 | .169    |



|                                                     |       |      |          |       |      |      |
|-----------------------------------------------------|-------|------|----------|-------|------|------|
| Fatty acid-binding protein 4 (FABP4)                | .01   | .003 | .00026   | -.002 | .003 | .582 |
| C-X-C motif chemokine 16 (CXCL16)                   | .009  | .003 | .000284  | .004  | .003 | .135 |
| C-X-C motif chemokine 1 (CXCL1)                     | .009  | .003 | .0004191 | .005  | .003 | .039 |
| C-C motif chemokine 3 (CCL3)                        | .008  | .003 | .001     | .002  | .003 | .348 |
| Myeloperoxidase (MPO)                               | .009  | .003 | .001     | .004  | .003 | .114 |
| Interleukin-18 (IL-18)                              | .009  | .003 | .001     | .003  | .003 | .323 |
| CD40 ligand (CD40L)                                 | .008  | .003 | .001     | .004  | .003 | .1   |
| Zscore: 192_NEMO                                    | .009  | .003 | .001     | .006  | .003 | .019 |
| Cathepsin L1 (CTSL1)                                | .009  | .003 | .001     | .003  | .003 | .19  |
| Angiopoietin-1 receptor (TIE2)                      | .009  | .003 | .001     | .004  | .003 | .106 |
| C-C motif chemokine 4 (CCL4)                        | .008  | .003 | .001     | .003  | .003 | .171 |
| CD40L receptor (CD40)                               | .008  | .003 | .001     | .005  | .003 | .056 |
| Tumor necrosis factor receptor 2 (TNF-R2)           | .008  | .003 | .003     | .003  | .003 | .256 |
| Spondin-1 (SPON1)                                   | .008  | .003 | .003     | .003  | .003 | .205 |
| Matrix metalloproteinase-10 (MMP-10)                | .008  | .003 | .003     | .006  | .003 | .02  |
| Kallikrein-11 (hK11)                                | .007  | .003 | .004     | .007  | .003 | .007 |
| Galanin peptides (GAL)                              | -.007 | .003 | .005     | -.004 | .003 | .158 |
| Leptin (LEP)                                        | .009  | .003 | .006     | -.006 | .004 | .163 |
| Thrombomodulin (TM)                                 | .007  | .003 | .007     | .002  | .003 | .384 |
| Stem cell factor (SCF)                              | -.007 | .003 | .011     | -.002 | .003 | .523 |
| Interleukin-6 receptor subunit alpha (IL-6RA)       | .006  | .003 | .013     | .002  | .003 | .541 |
| Pappalysin-1 (PAPPA)                                | .007  | .003 | .014     | .004  | .003 | .091 |
| Monocyte chemotactic protein 1 (MCP-1)              | .006  | .003 | .016     | .003  | .003 | .302 |
| Ovarian cancer-related tumor marker CA 125 (CA-125) | .006  | .003 | .016     | .003  | .003 | .206 |
| Matrix metalloproteinase-1 (MMP-1)                  | .006  | .003 | .017     | .005  | .003 | .055 |
| Vascular endothelial growth factor D (VEGF-D)       | .006  | .003 | .02      | .006  | .003 | .027 |

|                                   |      |      |      |      |      |      |
|-----------------------------------|------|------|------|------|------|------|
| Eosinophil cationic protein (ECP) | .006 | .003 | .031 | .002 | .003 | .514 |
|-----------------------------------|------|------|------|------|------|------|

**Supplemental Table III. Relationships between cardiovascular proteins and intima-media thickness of the common carotid artery (IMT-CCA) in the secondary meta-analysis performed in all samples.** This table only show the proteins with the Bonferroni-adjusted  $p$ -value < 0.00058 following adjustment for age and sex. Also data following further adjustment for cardiovascular (CV) risk factors are shown.

| Protein                                                | Age and sex-adjusted |          |            | Adjusted for CV risk factors |          |            |
|--------------------------------------------------------|----------------------|----------|------------|------------------------------|----------|------------|
|                                                        | Beta                 | SE       | $p$ -value | Beta                         | SE       | $p$ -value |
| C-X-C motif chemokine 6 (CXCL6)                        | .019136              | .000966  | <1.00e-20  | -.0003077                    | .0009195 | .7379182   |
| Matrix metalloproteinase-12 (MMP-12)                   | .0086274             | .0009674 | 4.75e-19   | .0070895                     | .0009207 | 1.36e-14   |
| Galanin peptides (GAL)                                 | -.0066507            | .0009664 | 5.89e-12   | -.0043581                    | .0009218 | 2.27e-06   |
| Matrix metalloproteinase-3 (MMP-3)                     | -.0059752            | .0009745 | 8.69e-10   | -.0040527                    | .0009244 | .0000116   |
| T-cell immunoglobulin and mucin domain 1 (TIM-1)       | .0038917             | .0009664 | .0000565   | .002177                      | .0009217 | .0181727   |
| N-terminal pro-B-type natriuretic peptide (NT-pro-BNP) | .0038128             | .0009679 | .0000817   | .0038116                     | .0009134 | .00003     |
| CD40L receptor (CD40)                                  | -.0037488            | .000966  | .0001041   | -.0030464                    | .0009195 | .0009227   |
| Monocyte chemotactic protein 1 (MCP-1)                 | -.0036474            | .0009664 | .0001604   | -.0022522                    | .0015258 | .1399173   |
| Caspase-8 (CASP-8)                                     | -.0035877            | .0009584 | .0001814   | -.0025357                    | .0009131 | .0054852   |

**Supplemental Table IV. Relationships between cardiovascular proteins and plaque of the common carotid artery (CCA) in the discovery analysis performed in the MDC study.** This table only show the proteins with FDR<5% following adjustment for age and sex. Also data following further adjustment for cardiovascular (CV) risk factors are shown.

| Protein                                                     | Age and sex-adjusted |      |                 | Adjusted for CV risk factors |      |                 |
|-------------------------------------------------------------|----------------------|------|-----------------|------------------------------|------|-----------------|
|                                                             | Beta                 | SE   | <i>p</i> -value | Beta                         | SE   | <i>p</i> -value |
| Matrix metalloproteinase-12 (MMP-12)                        | .243                 | .033 | 2.53e-13        | .107                         | .036 | .003            |
| Growth/differentiation factor 15 (GDF-15)                   | .191                 | .034 | 2.03e-08        | .082                         | .037 | .024            |
| Lectin-like oxidized LDL receptor 1 (LOX-1)                 | .15                  | .031 | 2.00e-06        | .051                         | .033 | .125            |
| Urokinase plasminogen activator surface receptor (U-PAR)    | .139                 | .032 | .000012         | .001                         | .035 | .972            |
| T-cell immunoglobulin and mucin domain 1 (TIM-1)            | .142                 | .033 | .0000165        | .042                         | .035 | .232            |
| Leptin (LEP)                                                | -.156                | .039 | .0000494        | -.127                        | .052 | .015            |
| Stem cell factor (SCF)                                      | -.122                | .031 | .0001           | -.071                        | .034 | .034            |
| Interleukin-6 (IL-6)                                        | .125                 | .032 | .0001           | .054                         | .035 | .116            |
| Hepatocyte growth factor (HGF)                              | .109                 | .033 | .001            | .016                         | .036 | .653            |
| Galanin peptides (GAL)                                      | -.111                | .032 | .001            | -.075                        | .034 | .03             |
| TNF-related apoptosis-inducing ligand receptor 2 (TRAIL-R2) | .109                 | .033 | .001            | .021                         | .034 | .537            |
| Matrix metalloproteinase-10 (MMP-10)                        | .096                 | .031 | .002            | .009                         | .033 | .786            |
| Platelet endothelial cell adhesion molecule (PECAM-1)       | -.085                | .031 | .007            | -.117                        | .033 | .00031          |

**Supplemental Table V. Relationships between cardiovascular proteins and plaque of the common carotid artery in the secondary meta-analysis performed in all samples.** This table only show the proteins with the Bonferroni-adjusted  $p$ -value $<0.00058$  following adjustment for age and sex. Also data following further adjustment for cardiovascular (CV) risk factors are shown.

| Protein                                                     | Age and sex-adjusted |          |            | Adjusted for CV risk factors |          |            |
|-------------------------------------------------------------|----------------------|----------|------------|------------------------------|----------|------------|
|                                                             | Beta                 | SE       | $p$ -value | Beta                         | SE       | $p$ -value |
| Matrix metalloproteinase-12 (MMP-12)                        | .2476898             | .022633  | 7.12e-28   | .1608395                     | .0244375 | 4.65e-11   |
| Growth/differentiation factor 15 (GDF-15)                   | .2017453             | .0242145 | 7.98e-17   | .1242752                     | .0265576 | 2.88e-06   |
| T-cell immunoglobulin and mucin domain 1 (TIM-1)            | .1478769             | .0224153 | 4.19e-11   | .0809469                     | .0240449 | .0007613   |
| Urokinase plasminogen activator surface receptor (U-PAR)    | .1314875             | .0219339 | 2.04e-09   | .0530132                     | .0235323 | .0242729   |
| Lectin-like oxidized LDL receptor 1 (LOX-1)                 | .1280879             | .0218167 | 4.33e-09   | .062087                      | .0230768 | .0071356   |
| Interleukin-6 (IL-6)                                        | .1286548             | .0220108 | 5.06e-09   | .0789739                     | .0238778 | .0009416   |
| Renin (REN)                                                 | .1200568             | .0222867 | 7.17e-08   | .1282493                     | .023854  | 7.60e-08   |
| Matrix metalloproteinase-7 (MMP-7)                          | .1054806             | .0210252 | 5.25e-07   | .0479172                     | .0219947 | .0293633   |
| Osteoprotegerin (OPG)                                       | .1147989             | .0230127 | 6.08e-07   | .0684991                     | .0243023 | .004823    |
| TNF-related apoptosis-inducing ligand receptor 2 (TRAIL-R2) | .113087              | .0231741 | 1.06e-06   | .0572704                     | .0241544 | .0177396   |
| Growth hormone (GH)                                         | .1194808             | .0245569 | 1.14e-06   | .1216194                     | .0261506 | 3.31e-06   |
| Stem cell factor (SCF)                                      | -.1036326            | .0214536 | 1.36e-06   | -.0482845                    | .0233011 | .0382469   |
| Leptin (LEP)                                                | -.1213664            | .0257292 | 2.39e-06   | -.1434985                    | .0351148 | .0000438   |
| Matrix metalloproteinase-10 (MMP-10)                        | .0959627             | .0212494 | 6.30e-06   | .0469172                     | .0224864 | .0369361   |
| Hepatocyte growth factor (HGF)                              | .0992593             | .0222543 | 8.19e-06   | .03362                       | .0244219 | .1686262   |
| N-terminal pro-B-type natriuretic peptide (NT-pro-BNP)      | .0907383             | .0218535 | .0000329   | .0848782                     | .0227822 | .0001948   |
| Galanin peptides (GAL)                                      | -.0900753            | .0220996 | .0000458   | -.0471975                    | .0236347 | .04583     |

**Supplemental Table VI. Mendelian randomization analysis for proteins vs intima-media thickness in the common carotid artery (IMT-CCA). The Wald ratio is given for the cis-SNP.**

| ADM    | Test            | Beta               | CIlow     | CIhigh   | P-value   |
|--------|-----------------|--------------------|-----------|----------|-----------|
|        | MR Egger        | -.021              | -.043     | .0009    | .05986072 |
|        | IVW             | .0016              | -.0056    | .009     | .65874466 |
|        | Weighted median | .0003              | -.0082    | .009     | .95112012 |
|        | Heterogeneity   | Q-test = .11023551 |           |          | .95       |
|        | Pleiotropy      | .0029              | .0003     | .006     | .03183598 |
|        | Wald ratio      | -.0025             | -.0126951 | .0075371 | .62       |
|        |                 |                    |           |          |           |
| AGRP   | Test            | Beta               | CIlow     | CIhigh   | P-value   |
|        | IVW             | -0.0001            | -0.016    | 0.015    | 0.98      |
|        |                 |                    |           |          |           |
| CA-125 | Test            | Beta               | CIlow     | CIhigh   | P-value   |
|        | MR Egger        | -.0011             | -.0074    | .0051    | .7181645  |
|        | IVW             | .002               | -.0022    | .006     | .34918146 |
|        | Weighted median | .0005              | -.0042    | .005     | .82952325 |
|        | Heterogeneity   | Q-test = .7653533  |           |          | 0.6820    |
|        | Pleiotropy      | .0013              | -.0006    | .003     | .18238378 |
|        | Wald ratio      | .0096977           | -.0016872 | .0210825 | 0.095     |
|        |                 |                    |           |          |           |
| MMP-12 | Test            | Beta               | CIlow     | CIhigh   | P-value   |
|        | MR Egger        | -.0033             | -.0082    | .0016    | .18765355 |
|        | IVW             | -.0021             | -.0046    | 0        | .11050337 |
|        | Weighted median | -.0022             | -.0048    | 0        | .10047767 |

|           |                 |                    |           |           |           |
|-----------|-----------------|--------------------|-----------|-----------|-----------|
|           | Heterogeneity   | Q-test = 3.7309537 |           |           | 0.1548    |
|           | Pleiotropy      | .0008              | -.0014    | .003      | .48603189 |
|           | Wald ratio      | -.0022196          | -.0047799 | .0003407  | 0.089     |
|           |                 |                    |           |           |           |
| GAL       | Test            | Beta               | CIlow     | CIhigh    | P-value   |
|           | MR Egger        | .0066              | -.0096    | .0228     | .42540727 |
|           | IVW             | -.002              | -.0075    | .003      | .4578023  |
|           | Weighted median | -.0032             | -.0094    | .003      | .30304541 |
|           | Heterogeneity   | Q-test = 1.927584  |           |           | 0.3814    |
|           | Pleiotropy      | -.0016             | -.0045    | .001      | .26799435 |
|           |                 |                    |           |           |           |
| NT-proBNP | Test            | Beta               | CIlow     | CIhigh    | P-value   |
|           | Wald ratio      | -.0141376          | -.0209243 | -.0073509 | 4.4e-05   |
|           |                 |                    |           |           |           |
| CD40      | Test            | Beta               | CIlow     | CIhigh    | P-value   |
|           | IVW             | 0.001              | -0.002    | 0.004     | 0.396     |
|           | Wald            | .0012891           | -.0176632 | .0202413  | 0.894     |
|           |                 |                    |           |           |           |
| MCP-1     | Test            | Beta               | CIlow     | CIhigh    | P-value   |
|           | MR Egger        | .006               | -.0078    | .0197     | .395936   |
|           | IVW             | .0041              | -.0026    | .011      | .23557432 |
|           | Weighted median | .0043              | -.0035    | .012      | .28374138 |
|           | Heterogeneity   | Q-test = 2.2002025 |           |           | 0.6990    |
|           | Pleiotropy      | -.0003             | -.0018    | .001      | .75611867 |
|           | Wald ratio      | -.0063391          | -.0312806 | .0186024  | 0.618     |
|           |                 |                    |           |           |           |
| ECP       | Test            | Beta               | CIlow     | CIhigh    | P-value   |

|               |                 |                    |           |          |                 |
|---------------|-----------------|--------------------|-----------|----------|-----------------|
|               | IVW             | 0.003              | -0.004    | 0.010    | 0.436           |
|               | Wald ratio      | .0039936           | -.0038691 | .0118564 | 0.319           |
|               |                 |                    |           |          |                 |
| <b>CASP-8</b> | Test            | Beta               | CIlow     | CIhigh   | <i>P</i> -value |
|               | IVW             | 0.003              | -0.003    | 0.009    | 0.406           |
|               | Wald ratio      | -.0010336          | -.0111644 | .0090973 | 0.842           |
|               |                 |                    |           |          |                 |
| <b>PAPPA</b>  | Test            | Beta               | CIlow     | CIhigh   | <i>P</i> -value |
|               | MR Egger        | -.0016             | -.0079    | .0047    | .6156199        |
|               | IVW             | -.0008             | -.0046    | .003     | .65494535       |
|               | Weighted median | -.0015             | -.0058    | .003     | .47686673       |
|               | Heterogeneity   | Q-test = 6.5847285 |           |          | 0.6803          |
|               | Pleiotropy      | .0002              | -.0009    | .001     | .76703536       |
|               | Wald ratio      | .0001064           | -.0186593 | .018872  | 0.99            |
|               |                 |                    |           |          |                 |
| <b>CD40L</b>  | Test            | Beta               | CIlow     | CIhigh   | <i>P</i> -value |
|               | Wald ratio      | -.0143979          | -.0380188 | .009223  | 0.232           |
|               |                 |                    |           |          |                 |
| <b>HSP-27</b> | Test            | Beta               | CIlow     | CIhigh   | <i>P</i> -value |
|               | IVW             | 0.003              | -0.002    | 0.008    | 0.227           |
|               | Wald ratio      | .0026247           | -.0025226 | .0077719 | 0.32            |
|               |                 |                    |           |          |                 |
| <b>TM</b>     | Test            | Beta               | CIlow     | CIhigh   | <i>P</i> -value |
|               | MR Egger        | .0011              | -.0061    | .0083    | .76519525       |
|               | IVW             | .0001              | -.0036    | .004     | .98804686       |
|               | Weighted median | .0001              | -.004     | .004     | .98091861       |
|               | Heterogeneity   | Q-test = .94707711 |           |          | 0.8141          |



|               |                 |                    |           |          |                 |
|---------------|-----------------|--------------------|-----------|----------|-----------------|
|               | Pleiotropy      | -.0003             | -.0019    | .001     | .73493893       |
|               | Wald ratio      | .0009975           | -.0034018 | .0053969 | 0.657           |
|               |                 |                    |           |          |                 |
| GDF-15        | Test            | Beta               | CIlow     | CIhigh   | <i>P</i> -value |
|               | Wald ratio      | .0024397           | -.003407  | .0082864 | 0.413           |
|               |                 |                    |           |          |                 |
| TIM-1 (KIM-1) | Test            | Beta               | CIlow     | CIhigh   | <i>P</i> -value |
|               | MR Egger        | -.0014             | -.0062    | .0034    | .56696709       |
|               | IVW             | -.0003             | -.003     | .002     | .80687169       |
|               | Weighted median | -.0006             | -.0034    | .002     | .6449583        |
|               | Heterogeneity   | Q-test = 10.397451 |           |          | 0.1089          |
|               | Pleiotropy      | .0003              | -.0007    | .001     | .52608466       |
|               | Wald ratio      | -.0004154          | -.0032648 | .0024341 | 0.775           |
|               |                 |                    |           |          |                 |
| IL-6          | Test            | Beta               | CIlow     | CIhigh   | <i>P</i> -value |
|               | Wald ratio      | .0034345           | -.0044334 | .0113023 | 0.392           |
|               |                 |                    |           |          |                 |
| U-PAR         | Test            | Beta               | CIlow     | CIhigh   | <i>P</i> -value |
|               | MR Egger        | .0032              | -.0369    | .0434    | .87484286       |
|               | IVW             | .0005              | -.0059    | .007     | .87939535       |
|               | Weighted median | .0034              | -.0058    | .013     | .47245486       |
|               | Heterogeneity   | Q-test = 10.574956 |           |          | 0.0605          |
|               | Pleiotropy      | -.0003             | -.004     | .003     | .89095638       |
|               | Wald ratio      | .0089965           | -.0060103 | .0240034 | 0.240           |
|               |                 |                    |           |          |                 |
| TRAIL-R2      | Test            | Beta               | CIlow     | CIhigh   | <i>P</i> -value |
|               | IVW             | 0.005              | 0.001     | 0.010    | 0.039           |

|        |                 |                    |           |          |                 |
|--------|-----------------|--------------------|-----------|----------|-----------------|
|        | Wald ratio      | .0048796           | -.0002341 | .0099934 | 0.061           |
|        |                 |                    |           |          |                 |
| LOX-1  | Test            | Beta               | CIlow     | CIhigh   | <i>P</i> -value |
|        | MR Egger        | -.0251             | -.0843    | .0341    | .40604307       |
|        | IVW             | -.0016             | -.0101    | .007     | .70710332       |
|        | Weighted median | -.0069             | -.018     | .004     | .22632227       |
|        | Heterogeneity   | Q-test = 7.1765584 |           |          | 0.0665          |
|        | Pleiotropy      | .0022              | -.0032    | .008     | .42549637       |
|        | Wald ratio      | -.0140713          | -.0328733 | .0047307 | 0.142           |
|        |                 |                    |           |          |                 |
| MMP-10 | Test            | Beta               | CIlow     | CIhigh   | <i>P</i> -value |
|        | IVW             | -0.003             | -0.008    | 0.002    | 0.253           |
|        | Wald ratio      | -0.005             | -0.011    | 0.001    | 0.134           |
|        |                 |                    |           |          |                 |
| LEP    | Test            | Beta               | CIlow     | CIhigh   | <i>P</i> -value |
|        | IVW             | 0.011              | -0.004    | 0.027    | 0.157           |
|        | Wald ratio      | -0.004             | -0.025    | 0.017    | 0.708           |

**Supplemental Table VII. Mendelian randomization analysis for proteins vs plaque.** The Wald ratio is given for the cis-SNP.

| ADM    | Test            | Beta          | CIlow     | CIhigh   | P-value   |
|--------|-----------------|---------------|-----------|----------|-----------|
|        | MR Egger        | -.3598        | -.9226    | .203     | .21015146 |
|        | IVW             | -.0272        | -.1959    | .142     | .75241995 |
|        | Weighted median | -.0322        | -.2117    | .147     | .72482511 |
|        | Heterogeneity   | Q-test = .055 |           |          | 0.97      |
|        | Pleiotropy      | .0423         | -.026     | .111     | .22457913 |
|        | Wald ratio      | -.0767247     | -.3057126 | .1522632 | 0.511     |
|        |                 |               |           |          |           |
| AGRP   | Test            | Beta          | CIlow     | CIhigh   | P-value   |
|        | IVW             | 0.066         | -0.302    | 0.433    | 0.727     |
|        |                 |               |           |          |           |
| CA-125 | Test            | Beta          | CIlow     | CIhigh   | P-value   |
|        | IVW             | 0.013         | -0.125    | 0.151    | 0.853     |
|        | Wald ratio      | -.1312036     | -.4033294 | .1409221 | 0.345     |
|        |                 |               |           |          |           |
| MMP-12 | Test            | Beta          | CIlow     | CIhigh   | P-value   |
|        | MR Egger        | -.0582        | -.1728    | .0565    | .31995942 |
|        | IVW             | -.0507        | -.11      | .009     | .09427343 |
|        | Weighted median | -.055         | -.115     | .005     | .07263621 |
|        | Heterogeneity   | Q-test = 3.66 |           |          | 0.1597    |
|        | Pleiotropy      | .0049         | -.0483    | .058     | .85705835 |

|                  |                 |               |           |          |           |
|------------------|-----------------|---------------|-----------|----------|-----------|
|                  | Wald ratio      | -.054968      | -.115138  | .005202  | 0.073     |
|                  |                 |               |           |          |           |
| <b>GAL</b>       | Test            | Beta          | CIlow     | CIhigh   | P-value   |
|                  | MR Egger        | .1703         | -.1578    | .4984    | .30898891 |
|                  | IVW             | .1129         | -.0064    | .232     | .06354459 |
|                  | Weighted median | .1199         | -.0243    | .264     | .10305043 |
|                  | Heterogeneity   | Q-test = 1.70 |           |          | 0.4274    |
|                  | Pleiotropy      | -.0111        | -.07      | .048     | .71302568 |
|                  |                 |               |           |          |           |
| <b>NT-proBNP</b> | Test            | Beta          | CIlow     | CIhigh   | P-value   |
|                  | Wald ratio      | -.0480679     | -.2006298 | .1044941 | 0.537     |
|                  |                 |               |           |          |           |
| <b>CD40</b>      | Test            | Beta          | CIlow     | CIhigh   | P-value   |
|                  | IVW             | 0.044         | -0.027    | 0.114    | 0.229     |
|                  | Wald ratio      | .0364905      | -.0362215 | .1092026 | 0.325     |
|                  |                 |               |           |          |           |
| <b>MCP-1</b>     | Test            | Beta          | CIlow     | CIhigh   | P-value   |
|                  | MR Egger        | .1121         | -.2004    | .4246    | .48204383 |
|                  | IVW             | -.0407        | -.193     | .112     | .60040622 |
|                  | Weighted median | -.0161        | -.1992    | .167     | .86362596 |
|                  | Heterogeneity   | Q-test = 3.60 |           |          | 0.4619    |
|                  | Pleiotropy      | -.0208        | -.0578    | .016     | .27237402 |
|                  | Wald ratio      | -.5118859     | -1.132933 | .1091614 | 0.106     |

|               |                 |                  |           |          |           |
|---------------|-----------------|------------------|-----------|----------|-----------|
|               |                 |                  |           |          |           |
| <b>ECP</b>    | Test            | Beta             | CIlow     | CIhigh   | P-value   |
|               | IVW             | 0.029            | -0.127    | 0.186    | 0.715     |
|               | Wald ratio      | .0303514         | -.1411608 | .2018636 | 0.729     |
|               |                 |                  |           |          |           |
| <b>CASP-8</b> | Test            | Beta             | CIlow     | CIhigh   | P-value   |
|               | IVW             | 0.087            | -0.056    | 0.231    | 0.233     |
|               | Wald ratio      | -.0144703        | -.2535302 | .2245896 | 0.906     |
|               |                 |                  |           |          |           |
| <b>PAPPA</b>  | Test            | Beta             | CIlow     | CIhigh   | P-value   |
|               | MR Egger        | .0035            | -.1491    | .156     | .96418686 |
|               | IVW             | .01              | -.079     | .099     | .82596516 |
|               | Weighted median | -.0079           | -.1074    | .092     | .87579888 |
|               | Heterogeneity   | Q-test =<br>7.87 |           |          | 0.54      |
|               | Pleiotropy      | .0013            | -.0234    | .026     | .91831104 |
|               | Wald ratio      | -.1095745        | -.5360287 | .3168798 | 0.615     |
|               |                 |                  |           |          |           |
| <b>CD40-L</b> | Test            | Beta             | CIlow     | CIhigh   | P-value   |
|               | Wald ratio      | -.0366492        | -.5755323 | .5022339 | 0.894     |
|               |                 |                  |           |          |           |
| <b>HSP-27</b> | Test            | Beta             | CIlow     | CIhigh   | P-value   |
|               | IVW             | -0.089           | -0.196    | 0.018    | 0.104     |
|               | Wald ratio      | -.1003208        | -.2108405 | .0101989 | 0.075     |
|               |                 |                  |           |          |           |
| <b>TM</b>     | Test            | Beta             | CIlow     | CIhigh   | P-value   |

|               |                 |               |           |           |           |
|---------------|-----------------|---------------|-----------|-----------|-----------|
|               | MR Egger        | -.09          | -.3036    | .1235     | .40868774 |
|               | IVW             | -.0126        | -.0974    | .072      | .77066475 |
|               | Weighted median | -.0215        | -.1097    | .067      | .63220423 |
|               | Heterogeneity   | Q-test = 5.17 |           |           | 0.1594    |
|               | Pleiotropy      | .021          | -.0285    | .071      | .40506449 |
|               | Wald ratio      | -.0289277     | -.1291412 | .0712858  | 0.572     |
|               |                 |               |           |           |           |
| GDF-15        | Test            | Beta          | CIlow     | CIhigh    | P-value   |
|               | Wald ratio      | -.1447547     | -.2774255 | -.0120838 | 0.032     |
|               |                 |               |           |           |           |
| TIM-1 (KIM-1) | Test            | Beta          | CIlow     | CIhigh    | P-value   |
|               | MR Egger        | -.037         | -.1236    | .0497     | .40320932 |
|               | IVW             | .0066         | -.0561    | .069      | .83553837 |
|               | Weighted median | -.0028        | -.0698    | .064      | .93496294 |
|               | Heterogeneity   | Q-test = 2.2  |           |           | 0.8999    |
|               | Pleiotropy      | .0127         | -.0047    | .03       | .15300234 |
|               | Wald ratio      | -.0101765     | -.0777486 | .0573955  | 0.768     |
|               |                 |               |           |           |           |
| IL-6          | Test            | Beta          | CIlow     | CIhigh    | P-value   |
|               | Wald ratio      | -.1614196     | -.3445498 | .0217107  | 0.084     |
|               |                 |               |           |           |           |
| U-PAR         | Test            | Beta          | CIlow     | CIhigh    | P-value   |
|               | MR Egger        | -.3264        | -.935     | .2822     | .29320363 |

|          |                 |              |           |          |           |
|----------|-----------------|--------------|-----------|----------|-----------|
|          | IVW             | -.094        | -.2392    | .051     | .20424098 |
|          | Weighted median | -.0269       | -.2112    | .157     | .77437583 |
|          | Heterogeneity   | Q-test = 4.3 |           |          | 0.4996    |
|          | Pleiotropy      | .0222        | -.0343    | .079     | .44098203 |
|          | Wald ratio      | -.2858131    | -.6247237 | .0530974 | 0.098     |
|          |                 |              |           |          |           |
| TRAIL-R2 | Test            | Beta         | CIlow     | CIhigh   | P-value   |
|          | IVW             | 0.026        | -0.084    | 0.137    | 0.642     |
|          | Wald ratio      | .0312297     | -.082286  | .1447453 | 0.590     |
|          |                 |              |           |          |           |
| LOX-1    | Test            | Beta         | CIlow     | CIhigh   | P-value   |
|          | MR Egger        | .3064        | -.686     | 1.2988   | .54505471 |
|          | IVW             | -.0818       | -.2827    | .119     | .4246994  |
|          | Weighted median | -.1532       | -.4059    | .1       | .23482173 |
|          | Heterogeneity   | Q-test = 1.9 |           |          | 0.5755    |
|          | Pleiotropy      | -.0361       | -.1263    | .054     | .43362355 |
|          | Wald ratio      | -.1857411    | -.6227482 | .2512661 | 0.405     |
|          |                 |              |           |          |           |
| MMP-10   | Test            | Beta         | CIlow     | CIhigh   | P-value   |
|          | IVW             | 0.049        | -0.068    | 0.166    | 0.408     |
|          | Wald ratio      | 0.032        | -0.124    | 0.188    | 0.691     |
|          |                 |              |           |          |           |
| LEP      | Test            | Beta         | CIlow     | CIhigh   | P-value   |
|          | IVW             | -0.082       | -0.420    | 0.257    | 0.637     |
|          | Wald ratio      | -0.187       | -0.631    | 0.258    | 0.411     |

**Supplemental Table VIII. Basic information on incident cases and follow-up details in the different cohorts.**

|                                                                                   | MDC             | PIVUS           | CARDIPP       | SAVA-control  | IMPROVE          |
|-----------------------------------------------------------------------------------|-----------------|-----------------|---------------|---------------|------------------|
| Number of incident myocardial infarction                                          | 447             | 84              | 25            | 39            | 116              |
| Number of incident ischemic stroke                                                | 392             | 89              | 29            | 39            | 59               |
| Number of incident myocardial infarction or ischemic strokes (combined end-point) | 754             | 147             | 45            | 66            | 175              |
| Median follow-up (and range) for combined endpoint (years)                        | 23.2 (0.1-25.2) | 15.0 (0.2-15.9) | 7.4 (0.1-9.6) | 5.0 (0.1-7.6) | 3.02 (2.98-3.11) |
| Person years at risk for combined end-point (PYAR)                                | 95992           | 11928           | 4596          | 5322          | 9846             |



**Supplemental Table IX. Relationships between cardiovascular proteins and incident atherosclerotic cardiovascular disease (either myocardial infarction or ischemic stroke) in the discovery phase in the MDC study.** This table only show the proteins with pFDR<0.05 following adjustment for age. HR= hazard ratio.

| Protein                                                     | Age and sex-adjusted |            |             |          | Adjusted for CV risk factors |            |             |          |
|-------------------------------------------------------------|----------------------|------------|-------------|----------|------------------------------|------------|-------------|----------|
|                                                             | HR                   | 95% CI low | 95% CI high | p-value  | HR                           | 95% CI low | 95% CI high | p-value  |
| Caspase-8 (CASP-8)                                          | 1.29693              | 3.36356    | 4.002823    | 2.82e-14 | 1.248571                     | 3.212341   | 3.803798    | 1.45e-10 |
| Matrix metalloproteinase-12 (MMP-12)                        | 1.303431             | 3.353485   | 4.075527    | 3.22e-12 | 1.192438                     | 3.001163   | 3.64006     | .000021  |
| T-cell immunoglobulin and mucin domain 1 (TIM-1)            | 1.287883             | 3.306863   | 3.998823    | 1.97e-11 | 1.178214                     | 2.971301   | 3.571551    | .000042  |
| Growth/differentiation factor 15 (GDF-15)                   | 1.28146              | 3.273959   | 3.990833    | 3.12e-10 | 1.168826                     | 2.929993   | 3.557294    | .000236  |
| Urokinase plasminogen activator surface receptor (U-PAR)    | 1.259859             | 3.218772   | 3.88064     | 1.17e-09 | 1.152577                     | 2.89794    | 3.486854    | .001     |
| Hepatocyte growth factor (HGF)                              | 1.221403             | 3.108064   | 3.732208    | 1.51e-07 | 1.074655                     | 2.693927   | 3.205923    | .082     |
| Interleukin-1 receptor antagonist protein (IL-1RA)          | 1.214096             | 3.086383   | 3.695072    | 2.87e-07 | 1.100759                     | 2.75385    | 3.306863    | .024     |
| Cathepsin D (CTSD)                                          | 1.203218             | 3.055673   | 3.654649    | 1.00e-06 | 1.065027                     | 2.677812   | 3.167682    | .116     |
| Interleukin-6 (IL-6)                                        | 1.165325             | 2.980229   | 3.465996    | 3.00e-06 | 1.076807                     | 2.721002   | 3.186745    | .047     |
| Lectin-like oxidized LDL receptor 1 (LOX-1)                 | 1.17586              | 2.995167   | 3.521898    | 4.00e-06 | 1.107383                     | 2.798266   | 3.287081    | .006     |
| Cathepsin L1 (CTSL1)                                        | 1.187678             | 3.016207   | 3.589454    | 4.00e-06 | 1.122996                     | 2.837717   | 3.350133    | .002     |
| N-terminal pro-B-type natriuretic peptide (NT-pro-BNP)      | 1.181754             | 2.992173   | 3.578701    | .000015  | 1.196021                     | 3.028296   | 3.632787    | 4.00e-06 |
| TNF-related apoptosis-inducing ligand receptor 2 (TRAIL-R2) | 1.116278             | 2.89215    | 3.234906    | .000017  | 1.062899                     | 2.712851   | 3.101854    | .058     |

|                                                |          |          |          |         |          |          |          |      |
|------------------------------------------------|----------|----------|----------|---------|----------|----------|----------|------|
| Adrenomedullin (AM)                            | 1.182937 | 2.986195 | 3.589454 | .000022 | 1.09856  | 2.75385  | 3.287081 | .022 |
| Cystatin-B (CSTB)                              | 1.158354 | 2.935859 | 3.47641  | .000077 | 1.060775 | 2.672462 | 3.142441 | .13  |
| Placenta growth factor (PIGF)                  | 1.166491 | 2.941736 | 3.528949 | .000101 | 1.085456 | 2.729177 | 3.234906 | .039 |
| Tumor necrosis factor receptor 1 (TNF-R1)      | 1.162997 | 2.935859 | 3.511348 | .00012  | 1.071436 | 2.691235 | 3.186745 | .085 |
| Macrophage colony-stimulating factor 1 (CSF-1) | 1.154884 | 2.924139 | 3.469463 | .000141 | 1.091988 | 2.751098 | 3.244626 | .023 |
| Fibroblast growth factor 23 (FGF-23)           | 1.143393 | 2.89794  | 3.414394 | .000236 | 1.073581 | 2.710139 | 3.177199 | .061 |
| Follistatin (FS)                               | 1.145682 | 2.89794  | 3.431509 | .000302 | 1.059715 | 2.672462 | 3.136163 | .131 |
| Tumor necrosis factor receptor 2 (TNF-R2)      | 1.145682 | 2.89794  | 3.431509 | .000315 | 1.072508 | 2.702021 | 3.180378 | .07  |
| Stem cell factor (SCF)                         | .8772178 | 2.263699 | 2.565106 | .00034  | .9559975 | 2.425409 | 2.803868 | .244 |
| Vascular endothelial growth factor A (VEGF-A)  | 1.125244 | 2.851941 | 3.350133 | .001    | 1.040811 | 2.630043 | 3.067921 | .288 |
| Galanin peptides (GAL)                         | .8842636 | 2.272771 | 2.593478 | .001    | .9436499 | 2.396478 | 2.770423 | .139 |
| C-C motif chemokine 20 (CCL20)                 | 1.118513 | 2.849091 | 3.300256 | .001    | 1.046028 | 2.651167 | 3.074063 | .213 |
| C-C motif chemokine 3 (CCL3)                   | 1.116278 | 2.846243 | 3.29037  | .001    | 1.074655 | 2.718282 | 3.170851 | .05  |
| Interleukin-8 (IL-8)                           | 1.112934 | 2.826389 | 3.293662 | .002    | 1.056541 | 2.675135 | 3.111174 | .128 |
| Resistin (RETN)                                | 1.115162 | 2.826389 | 3.313483 | .003    | 1.065027 | 2.693927 | 3.142441 | .088 |
| Fatty acid-binding protein 4 (FABP4)           | 1.12637  | 2.829217 | 3.383802 | .003    | 1.015113 | 2.529445 | 3.037394 | .737 |
| Leptin (LEP)                                   | 1.134282 | 2.820742 | 3.455614 | .006    | 1.013085 | 2.462064 | 3.120521 | .833 |
| Osteoprotegerin (OPG)                          | 1.108491 | 2.795469 | 3.306863 | .007    | 1.03977  | 2.622164 | 3.07099  | .311 |
| Interleukin-18 (IL-18)                         | 1.097462 | 2.773195 | 3.25763  | .012    | 1.011061 | 2.552313 | 2.974274 | .784 |
| Tissue-type plasminogen activator (t-PA)       | 1.099659 | 2.77597  | 3.267418 | .012    | 1.025315 | 2.583125 | 3.022245 | .53  |
| Matrix metalloproteinase-7 (MMP-7)             | 1.10186  | 2.773195 | 3.283796 | .013    | 1.015113 | 2.562543 | 2.989183 | .704 |
| Eosinophil cationic protein (ECP)              | 1.093081 | 2.764888 | 3.234906 | .015    | 1.055485 | 2.664456 | 3.114286 | .152 |

|                                                                 |          |          |          |      |          |          |          |      |
|-----------------------------------------------------------------|----------|----------|----------|------|----------|----------|----------|------|
| Myeloperoxidase (MPO)                                           | 1.093081 | 2.764888 | 3.234906 | .015 | 1.043938 | 2.640584 | 3.074063 | .245 |
| Tumor necrosis factor ligand<br>superfamily member 14 (TNFSF14) | 1.086542 | 2.756606 | 3.209131 | .019 | 1.019182 | 2.580544 | 2.989183 | .605 |

**Supplemental Table X. Relationships between cardiovascular proteins and incident atherosclerotic cardiovascular disease** (either myocardial infarction or ischemic stroke) in the secondary meta-analysis performed using all samples. This table only show the proteins with  $p < 0.00058$  in the meta-analysis following adjustment for age and sex and  $p < 0.05$  for the p-value also adjusted for CV risk factors. HR= hazard ratio.

| Protein                                                  | Age and sex-adjusted |           |            |          | Adjusted for CV risk factors |           |            |          |
|----------------------------------------------------------|----------------------|-----------|------------|----------|------------------------------|-----------|------------|----------|
|                                                          | HR                   | 95%CI low | 95%CI high | p-value  | HR                           | 95%CI low | 95%CI high | p-value  |
| Matrix metalloproteinase-12 (MMP-12)                     | 1.324515             | 1.248755  | 1.404871   | 8.57e-21 | 1.202559                     | 1.128907  | 1.281016   | 1.06e-08 |
| Growth/differentiation factor 15 (GDF-15)                | 1.307067             | 1.229887  | 1.38909    | 6.49e-18 | 1.181907                     | 1.105645  | 1.263428   | 9.05e-07 |
| T-cell immunoglobulin and mucin domain 1 (TIM-1)         | 1.26365              | 1.191341  | 1.340348   | 7.05e-15 | 1.159051                     | 1.088634  | 1.234023   | 3.92e-06 |
| Urokinase plasminogen activator surface receptor (U-PAR) | 1.252502             | 1.179787  | 1.329698   | 1.61e-13 | 1.147482                     | 1.076778  | 1.222829   | .0000224 |
| Interleukin-1 receptor antagonist protein (IL-1RA)       | 1.232943             | 1.163066  | 1.307019   | 2.00e-12 | 1.106741                     | 1.035832  | 1.182504   | .0026813 |
| Interleukin-6 (IL-6)                                     | 1.197999             | 1.137395  | 1.261833   | 9.06e-12 | 1.102903                     | 1.040307  | 1.169266   | .0010178 |
| Caspase-8 (CASP-8)                                       | 1.200119             | 1.137295  | 1.266414   | 2.94e-11 | 1.164389                     | 1.102227  | 1.230058   | 5.41e-08 |
| Hepatocyte growth factor (HGF)                           | 1.222652             | 1.151791  | 1.297872   | 4.13e-11 | 1.075624                     | 1.007826  | 1.147983   | .0281872 |

|                                                             |          |          |          |          |          |          |          |          |
|-------------------------------------------------------------|----------|----------|----------|----------|----------|----------|----------|----------|
| N-terminal pro-B-type natriuretic peptide (NT-pro-BNP)      | 1.205935 | 1.138968 | 1.27684  | 1.33e-10 | 1.207319 | 1.139463 | 1.279215 | 1.73e-10 |
| Cystatin-B (CSTB)                                           | 1.195346 | 1.129323 | 1.265229 | 7.49e-10 | 1.093263 | 1.028638 | 1.161947 | .004127  |
| TNF-related apoptosis-inducing ligand receptor 2 (TRAIL-R2) | 1.148929 | 1.098896 | 1.201239 | 9.87e-10 | 1.094285 | 1.036845 | 1.154907 | .0010556 |
| Lectin-like oxidized LDL receptor 1 (LOX-1)                 | 1.185866 | 1.121422 | 1.254014 | 2.23e-09 | 1.196907 | 1.128169 | 1.269833 | 2.58e-09 |
| Adrenomedullin (AM)                                         | 1.200169 | 1.126934 | 1.278164 | 1.35e-08 | 1.10572  | 1.036381 | 1.179698 | .002354  |
| Vascular endothelial growth factor A (VEGF-A)               | 1.167355 | 1.103222 | 1.235217 | 7.99e-08 | 1.085515 | 1.022872 | 1.151995 | .0068164 |
| Fibroblast growth factor 23 (FGF-23)                        | 1.165049 | 1.101071 | 1.232743 | 1.15e-07 | 1.092145 | 1.029192 | 1.158949 | .0036151 |
| Tumor necrosis factor receptor 1 (TNF-R1)                   | 1.177516 | 1.108369 | 1.250977 | 1.21e-07 | 1.088463 | 1.022796 | 1.158345 | .0075856 |
| Tumor necrosis factor receptor 2 (TNF-R2)                   | 1.165905 | 1.098907 | 1.236987 | 3.70e-07 | 1.094236 | 1.029319 | 1.163247 | .0039006 |
| Follistatin (FS)                                            | 1.160758 | 1.093658 | 1.231975 | 9.25e-07 | 1.077557 | 1.013595 | 1.145556 | .0167332 |
| Placenta growth factor (PlGF)                               | 1.162622 | 1.094306 | 1.235204 | 1.08e-06 | 1.087623 | 1.023109 | 1.156206 | .0070967 |
| Cathepsin L1 (CTSL1)                                        | 1.15399  | 1.088197 | 1.223761 | 1.73e-06 | 1.10677  | 1.042277 | 1.175254 | .000927  |

|                                                |          |          |          |          |          |          |          |          |
|------------------------------------------------|----------|----------|----------|----------|----------|----------|----------|----------|
| Interleukin-8 (IL-8)                           | 1.139499 | 1.0796   | 1.202722 | 2.14e-06 | 1.078184 | 1.019048 | 1.140752 | .0089067 |
| C-C motif chemokine 3 (CCL3)                   | 1.131917 | 1.074657 | 1.192227 | 2.89e-06 | 1.086286 | 1.025154 | 1.151063 | .0050998 |
| Macrophage colony-stimulating factor 1 (CSF-1) | 1.147142 | 1.080569 | 1.217817 | 6.79e-06 | 1.08522  | 1.021904 | 1.152459 | .0076662 |
| Resistin (RETN)                                | 1.124967 | 1.062331 | 1.191297 | .0000561 | 1.075952 | 1.014216 | 1.141446 | .0151725 |
| Protein S100-A12 (EN-RAGE)                     | 1.179089 | 1.080398 | 1.286796 | .0002208 | 1.144343 | 1.047005 | 1.250729 | .0029513 |

**Supplemental Table XI. Mendelian randomization of proteins vs coronary heart disease** for the proteins being related to incident atherosclerotic disease in the observational part of the study. The SNPs used are given in Supplemental Table I.

| Protein   | Only cis-SNP |             |              |         | Cis and trans-SNPs |             |              |          |
|-----------|--------------|-------------|--------------|---------|--------------------|-------------|--------------|----------|
|           | beta         | 95%CI-lower | 95%CI-higher | P-value | beta               | 95%CI-lower | 95%CI-higher | P-value  |
| ADM       | -0.144       | -0.29       | 0            | 0.04765 | -0.009             | -0.1        | 0.09         | 0.85506  |
| CCL3      | -0.013       | -0.07       | 0.04         | 0.63217 | 0.012              | -0.04       | 0.06         | 0.64243  |
| CSTB      | 0.022        | -0.01       | 0.06         | 0.24206 | 0.019              | -0.02       | 0.05         | 0.30183  |
| FGF-23    | 0.005        | -0.27       | 0.28         | 0.97345 | 0.06               | -0.04       | 0.16         | 0.23263  |
| FS        | 0.178        | 0.03        | 0.32         | 0.01682 | 0.046              | -0.04       | 0.14         | 0.30817  |
| GDF-15    | -0.005       | -0.08       | 0.07         | 0.89053 | -0.023             | -0.1        | 0.05         | 0.54571  |
| IL-6      | na           | na          | na           | na      | na                 | na          | na           | na       |
| IL-8      | 0.16         | -0.01       | 0.33         | 0.07295 | 0.16               | -0.01       | 0.33         | 0.07295  |
| LOX-1     | -0.202       | -0.42       | 0.01         | 0.06702 | 0.028              | -0.06       | 0.12         | 0.53854  |
| MMP-12    | -0.058       | -0.1        | -0.02        | 0.0022  | -0.054             | -0.09       | -0.02        | 0.00404  |
| NT-proBNP | 0.015        | -0.07       | 0.1          | 0.74186 | 0.015              | -0.07       | 0.1          | 0.74186  |
| SCF       | -0.036       | -0.31       | 0.24         | 0.79547 | -0.128             | -0.18       | -0.08        | 8.23E-04 |
| TNF-R1    | na           | na          | na           | na      | na                 | na          | na           | na       |
| TNF-R2    | -0.04        | -0.19       | 0.11         | 0.61076 | 0.146              | 0.04        | 0.26         | 0.00906  |
| TRAIL-R2  | -0.013       | -0.08       | 0.05         | 0.68636 | -0.018             | -0.08       | 0.05         | 0.58213  |
| U-PAR     | -0.042       | -0.22       | 0.14         | 0.64995 | 0.047              | -0.04       | 0.14         | 0.28947  |
| VEGF-A    | -0.044       | -0.09       | 0            | 0.03881 | -0.013             | -0.05       | 0.02         | 0.49281  |

**Supplemental Table XII. Mendelian randomization of proteins vs ischemic stroke** for the proteins being related to incident atherosclerotic disease in the observational part of the study. The SNPs used are given in Supplemental Table I.

| Protein   | Only cis-SNP |             |              |          | Cis and trans-SNPs |             |              |          |
|-----------|--------------|-------------|--------------|----------|--------------------|-------------|--------------|----------|
|           | beta         | 95%CI-lower | 95%CI-higher | P-value  | beta               | 95%CI-lower | 95%CI-higher | P-value  |
| ADM       | -0.113       | -0.27       | 0.04         | 0.14247  | -0.167             | -0.28       | -0.06        | 0.00301  |
| CCL3      | -0.002       | -0.06       | 0.05         | 0.93189  | 0.027              | -0.03       | 0.08         | 0.32998  |
| CSTB      | -0.012       | -0.05       | 0.03         | 0.56229  | -0.016             | -0.05       | 0.02         | 0.42934  |
| FGF-23    | -0.316       | -0.61       | -0.02        | 0.03801  | 0.011              | -0.1        | 0.12         | 0.83304  |
| FS        | 0.089        | -0.07       | 0.24         | 0.25955  | 0.072              | -0.02       | 0.17         | 0.1414   |
| GDF-15    | 0.046        | -0.03       | 0.12         | 0.2535   | 0.046              | -0.03       | 0.12         | 0.2535   |
| IL-6      | na           | na          | na           | na       | na                 | na          | na           | na       |
| IL-8      | -0.034       | -0.3        | 0.23         | 0.79795  | -0.034             | -0.3        | 0.23         | 0.79795  |
| LOX-1     | -0.011       | -0.26       | 0.24         | 0.92917  | -0.103             | -0.2        | -0.01        | 0.03283  |
| MMP-12    | -0.099       | -0.14       | -0.06        | 5.54E-07 | -0.092             | -0.13       | -0.05        | 2.77E-03 |
| NT-proBNP | -0.044       | -0.14       | 0.05         | 0.36657  | -0.044             | -0.14       | 0.05         | 0.36657  |
| SCF       | 0.278        | -0.03       | 0.58         | 0.07245  | -0.053             | -0.11       | 0            | 0.05494  |
| TNF-R1    | -0.019       | -0.28       | 0.24         | 0.88472  | 0.001              | -0.16       | 0.17         | 0.98906  |
| TNF-R2    | -0.113       | -0.27       | 0.04         | 0.14649  | 0.184              | 0.07        | 0.29         | 0.00103  |
| TRAIL-R2  | 0.019        | -0.05       | 0.09         | 0.60433  | 0.017              | -0.05       | 0.09         | 0.63827  |
| U-PAR     | -0.075       | -0.26       | 0.11         | 0.43294  | 0.023              | -0.07       | 0.11         | 0.6138   |
| VEGF-A    | 0.007        | -0.04       | 0.05         | 0.76119  | 0.02               | -0.02       | 0.06         | 0.3309   |



## Major Resources Table

### Data & Code Availability

| Description      | Source /<br>Repository | Persistent ID / URL                                                                                                                                   |
|------------------|------------------------|-------------------------------------------------------------------------------------------------------------------------------------------------------|
| Statistical code | GitHub                 | <a href="https://github.com/UppsalaClinicalResearchCenter/code_using_STATA16">https://github.com/UppsalaClinicalResearchCenter/code_using_STATA16</a> |
